# Supplementary material
Source: Research Square preprint supplement (doi:10.21203/rs.3.rs-9818070/v1)
Supplement: Supplementary file 1 [file daba85d900f2b530392a81e0.docx]

# **Climate refugia and tailings-impacted areas: a spatial framework for prioritizing conservation and restoration of native bees in the Rio Doce watershed**

# **Tables**

## **Table S1.** List of the 48 native bee species in the Doce River watershed and the number of occurrence records per species after spatial thinning.

| Species | Family | Tribe | Records |
| --- | --- | --- | --- |
| *Ancyloscelis apiformis* | Apidae | Emphorini | 129 |
| *Bombus morio* | Apidae | Bombini | 375 |
| *Cephalotrigona capitata* | Apidae | Meliponini | 70 |
| *Ceratina chloris* | Apidae | Ceratinini | 31 |
| *Eufriesea violacea* | Apidae | Euglossini | 67 |
| *Eufriesea violascens* | Apidae | Euglossini | 12 |
| *Euglossa amazonica* | Apidae | Euglossini | 58 |
| *Euglossa analis* | Apidae | Euglossini | 59 |
| *Euglossa annectans* | Apidae | Euglossini | 38 |
| *Euglossa carolina* | Apidae | Euglossini | 22 |
| *Euglossa cordata* | Apidae | Euglossini | 182 |
| *Euglossa crassipunctata* | Apidae | Euglossini | 114 |
| *Euglossa fimbriata* | Apidae | Euglossini | 80 |
| *Euglossa leucotricha* | Apidae | Euglossini | 31 |
| *Euglossa pleosticta* | Apidae | Euglossini | 74 |
| *Euglossa securigera* | Apidae | Euglossini | 73 |
| *Euglossa stellfeldi* | Apidae | Euglossini | 10 |
| *Euglossa townsendi* | Apidae | Euglossini | 113 |
| *Euglossa truncata* | Apidae | Euglossini | 38 |
| *Euglossa violaceifrons* | Apidae | Euglossini | 26 |
| *Eulaema cingulata* | Apidae | Euglossini | 825 |
| *Eulaema flavescens* | Apidae | Euglossini | 69 |
| *Eulaema nigrita* | Apidae | Euglossini | 425 |
| *Exaerete smaragdina* | Apidae | Euglossini | 383 |
| *Exomalopsis analis* | Apidae | Exomalopsini | 176 |
| *Exomalopsis auropilosa* | Apidae | Exomalopsini | 63 |
| *Friesella schrottkyi* | Apidae | Meliponini | 40 |
| *Leiopodus lacertinus* | Apidae | Protepeolini | 42 |
| *Leurotrigona muelleri* | Apidae | Meliponini | 83 |
| *Megalopta amoena* | Halictidae | Augochlorini | 39 |
| *Melipona bicolor* | Apidae | Meliponini | 72 |
| *Melipona quadrifasciata* | Apidae | Meliponini | 261 |
| *Melitoma segmentaria* | Apidae | Emphorini | 156 |
| *Nannotrigona testaceicornis* | Apidae | Meliponini | 289 |
| *Paratrigona subnuda* | Apidae | Meliponini | 60 |
| *Partamona helleri* | Apidae | Meliponini | 165 |
| *Plebeia droryana* | Apidae | Meliponini | 94 |
| *Plebeia poecilochroa* | Apidae | Meliponini | 8 |
| *Pseudaugochlora graminea* | Halictidae | Augochlorini | 255 |
| *Scaptotrigona postica* | Apidae | Meliponini | 89 |
| *Schwarziana quadripunctata* | Apidae | Meliponini | 91 |
| *Tetragonisca angustula* | Apidae | Meliponini | 1538 |
| *Thygater analis* | Apidae | Eucerini | 141 |
| *Trigona branneri* | Apidae | Meliponini | 198 |
| *Trigona fuscipennis* | Apidae | Meliponini | 313 |
| *Trigona hyalinata* | Apidae | Meliponini | 152 |
| *Trigona spinipes* | Apidae | Meliponini | 1164 |
| *Xylocopa muscaria* | Apidae | Xylocopini | 91 |

## **Table S2.** Statistical metrics used in the selection of Maxent models for 48 native bee species across the Doce River Basin, based on the top-performing MaxEnt models considering the lowest omission rate (OR) and the highest area under the curve (AUC). Feature classes (FC) and regularization multipliers (RM) represent the optimized Maxent parameters related to model complexity.

| Species | Model | FC | RM | OR | AUC |
| --- | --- | --- | --- | --- | --- |
| *Ancyloscelis apiformis* | 1 | PQ | 0.5 | 0.19 | 0.71 |
| *Ancyloscelis apiformis* | 2 | LPQ | 1 | 0.21 | 0.71 |
| *Ancyloscelis apiformis* | 3 | PQ | 1 | 0.19 | 0.71 |
| *Bombus morio* | 1 | LQ | 1 | 0.12 | 0.9 |
| *Bombus morio* | 2 | LQ | 2 | 0.1 | 0.89 |
| *Bombus morio* | 3 | PQ | 3 | 0.1 | 0.89 |
| *Bombus morio* | 4 | LPQ | 3.5 | 0.09 | 0.89 |
| *Bombus morio* | 5 | PQ | 3.5 | 0.09 | 0.89 |
| *Bombus morio* | 6 | LPQ | 4 | 0.09 | 0.89 |
| *Bombus morio* | 7 | PQ | 4 | 0.09 | 0.89 |
| *Cephalotrigona capitata* | 1 | LQ | 1 | 0.21 | 0.78 |
| *Cephalotrigona capitata* | 2 | LQ | 1.5 | 0.21 | 0.78 |
| *Cephalotrigona capitata* | 3 | LQ | 2 | 0.19 | 0.77 |
| *Cephalotrigona capitata* | 4 | L | 1 | 0.16 | 0.77 |
| *Cephalotrigona capitata* | 5 | L | 1.5 | 0.17 | 0.77 |
| *Cephalotrigona capitata* | 6 | L | 2 | 0.17 | 0.77 |
| *Cephalotrigona capitata* | 7 | LQ | 2.5 | 0.16 | 0.77 |
| *Ceratina chloris* | 1 | PQ | 1.5 | 0.26 | 0.72 |
| *Ceratina chloris* | 2 | LP | 2.5 | 0.22 | 0.72 |
| *Ceratina chloris* | 3 | LP | 3 | 0.22 | 0.72 |
| *Ceratina chloris* | 4 | LPQ | 1.5 | 0.26 | 0.72 |
| *Ceratina chloris* | 5 | LP | 2 | 0.22 | 0.72 |
| *Ceratina chloris* | 6 | LP | 3.5 | 0.22 | 0.71 |
| *Ceratina chloris* | 7 | P | 4 | 0.19 | 0.71 |
| *Eufriesea violacea* | 1 | P | 1.5 | 0.15 | 0.81 |
| *Eufriesea violacea* | 2 | PQ | 0.5 | 0.27 | 0.81 |
| *Eufriesea violacea* | 3 | P | 1 | 0.15 | 0.8 |
| *Eufriesea violacea* | 4 | LP | 0.5 | 0.17 | 0.8 |
| *Eufriesea violacea* | 5 | LP | 1 | 0.17 | 0.8 |
| *Eufriesea violacea* | 6 | P | 0.5 | 0.17 | 0.8 |
| *Eufriesea violacea* | 7 | P | 5 | 0.16 | 0.82 |
| *Eufriesea violascens* | 1 | LQ | 0.5 | 0.33 | 0.56 |
| *Euglossa amazonica* | 1 | L | 3.5 | 0.19 | 0.75 |
| *Euglossa amazonica* | 2 | L | 4 | 0.17 | 0.75 |
| *Euglossa amazonica* | 3 | L | 4.5 | 0.17 | 0.75 |
| *Euglossa amazonica* | 4 | L | 5 | 0.15 | 0.75 |
| *Euglossa amazonica* | 5 | LQ | 5 | 0.17 | 0.74 |
| *Euglossa amazonica* | 6 | Q | 5 | 0.17 | 0.74 |
| *Euglossa amazonica* | 7 | LQ | 2.5 | 0.19 | 0.75 |
| *Euglossa analis* | 1 | LPQ | 4 | 0.12 | 0.75 |
| *Euglossa analis* | 2 | LP | 4 | 0.1 | 0.75 |
| *Euglossa analis* | 3 | PQ | 4 | 0.12 | 0.75 |
| *Euglossa analis* | 4 | P | 4 | 0.12 | 0.75 |
| *Euglossa analis* | 5 | LPQ | 3.5 | 0.13 | 0.75 |
| *Euglossa analis* | 6 | LP | 3.5 | 0.1 | 0.75 |
| *Euglossa analis* | 7 | PQ | 3.5 | 0.13 | 0.75 |
| *Euglossa annectans* | 1 | LP | 1.5 | 0.08 | 0.66 |
| *Euglossa carolina* | 1 | LPQ | 1 | 0 | 0.86 |
| *Euglossa carolina* | 2 | LP | 1 | 0 | 0.86 |
| *Euglossa carolina* | 3 | PQ | 1 | 0 | 0.85 |
| *Euglossa carolina* | 4 | LPQ | 0.5 | 0.04 | 0.85 |
| *Euglossa carolina* | 5 | PQ | 0.5 | 0.04 | 0.85 |
| *Euglossa carolina* | 6 | LP | 0.5 | 0.04 | 0.85 |
| *Euglossa carolina* | 7 | L | 1 | 0 | 0.84 |
| *Euglossa cordata* | 1 | LP | 4.5 | 0.11 | 0.72 |
| *Euglossa cordata* | 2 | PQ | 2.5 | 0.13 | 0.74 |
| *Euglossa cordata* | 3 | LPQ | 2.5 | 0.12 | 0.74 |
| *Euglossa cordata* | 4 | LPQ | 2 | 0.13 | 0.74 |
| *Euglossa cordata* | 5 | PQ | 2 | 0.14 | 0.74 |
| *Euglossa cordata* | 6 | LP | 1.5 | 0.14 | 0.74 |
| *Euglossa cordata* | 7 | LP | 2 | 0.13 | 0.74 |
| *Euglossa crassipunctata* | 1 | LPQ | 5 | 0.06 | 0.7 |
| *Euglossa crassipunctata* | 2 | LP | 5 | 0.05 | 0.71 |
| *Euglossa crassipunctata* | 3 | LP | 4.5 | 0.05 | 0.71 |
| *Euglossa crassipunctata* | 4 | P | 5 | 0.06 | 0.7 |
| *Euglossa crassipunctata* | 5 | P | 4.5 | 0.06 | 0.7 |
| *Euglossa crassipunctata* | 6 | LPQ | 4.5 | 0.06 | 0.7 |
| *Euglossa fimbriata* | 1 | LP | 5 | 0.19 | 0.76 |
| *Euglossa fimbriata* | 2 | P | 5 | 0.19 | 0.76 |
| *Euglossa fimbriata* | 3 | P | 4.5 | 0.19 | 0.76 |
| *Euglossa fimbriata* | 4 | LP | 4.5 | 0.19 | 0.75 |
| *Euglossa fimbriata* | 5 | LP | 4 | 0.19 | 0.75 |
| *Euglossa fimbriata* | 6 | P | 4 | 0.19 | 0.75 |
| *Euglossa fimbriata* | 7 | P | 3.5 | 0.2 | 0.74 |
| *Euglossa leucotricha* | 1 | L | 2 | 0.09 | 0.76 |
| *Euglossa leucotricha* | 2 | L | 2.5 | 0.09 | 0.75 |
| *Euglossa leucotricha* | 3 | L | 3 | 0.09 | 0.75 |
| *Euglossa leucotricha* | 4 | L | 1.5 | 0.09 | 0.75 |
| *Euglossa leucotricha* | 5 | L | 3.5 | 0.09 | 0.75 |
| *Euglossa leucotricha* | 6 | PQ | 2 | 0.09 | 0.75 |
| *Euglossa leucotricha* | 7 | L | 1 | 0.13 | 0.75 |
| *Euglossa pleosticta* | 1 | LPQ | 3 | 0.04 | 0.84 |
| *Euglossa pleosticta* | 2 | PQ | 3 | 0.04 | 0.84 |
| *Euglossa pleosticta* | 3 | LPQ | 2.5 | 0.04 | 0.84 |
| *Euglossa pleosticta* | 4 | PQ | 2.5 | 0.04 | 0.84 |
| *Euglossa pleosticta* | 5 | LQ | 5 | 0.04 | 0.84 |
| *Euglossa pleosticta* | 6 | L | 1.5 | 0 | 0.84 |
| *Euglossa pleosticta* | 7 | LQ | 4.5 | 0.04 | 0.84 |
| *Euglossa securigera* | 1 | LQ | 0.5 | 0.01 | 0.83 |
| *Euglossa securigera* | 2 | LQ | 1 | 0.01 | 0.82 |
| *Euglossa securigera* | 3 | LQ | 1.5 | 0.03 | 0.82 |
| *Euglossa securigera* | 4 | LQ | 2 | 0.04 | 0.81 |
| *Euglossa securigera* | 5 | LQ | 2.5 | 0.07 | 0.81 |
| *Euglossa securigera* | 6 | LQ | 3 | 0.1 | 0.8 |
| *Euglossa securigera* | 7 | LPQ | 0.5 | 0.04 | 0.83 |
| *Euglossa stellfeldi* | 1 | P | 1.5 | 0.2 | 0.79 |
| *Euglossa stellfeldi* | 2 | P | 1 | 0.2 | 0.78 |
| *Euglossa stellfeldi* | 3 | P | 0.5 | 0.2 | 0.78 |
| *Euglossa stellfeldi* | 4 | LQ | 2 | 0.1 | 0.86 |
| *Euglossa stellfeldi* | 5 | Q | 2 | 0.1 | 0.86 |
| *Euglossa townsendi* | 1 | LPQ | 5 | 0.15 | 0.68 |
| *Euglossa truncata* | 1 | L | 5 | 0.23 | 0.59 |
| *Euglossa violaceifrons* | 1 | Q | 0.5 | 0 | 0.94 |
| *Euglossa violaceifrons* | 2 | L | 0.5 | 0 | 0.93 |
| *Euglossa violaceifrons* | 3 | PQ | 0.5 | 0 | 0.91 |
| *Euglossa violaceifrons* | 4 | LPQ | 0.5 | 0 | 0.91 |
| *Euglossa violaceifrons* | 5 | LP | 0.5 | 0 | 0.91 |
| *Euglossa violaceifrons* | 6 | P | 0.5 | 0 | 0.89 |
| *Euglossa violaceifrons* | 7 | LQ | 0.5 | 0.04 | 0.92 |
| *Eulaema cingulata* | 1 | LPQ | 0.5 | 0.17 | 0.71 |
| *Eulaema cingulata* | 2 | LQ | 0.5 | 0.17 | 0.71 |
| *Eulaema cingulata* | 3 | LPQ | 1 | 0.14 | 0.73 |
| *Eulaema cingulata* | 4 | PQ | 1 | 0.17 | 0.73 |
| *Eulaema cingulata* | 5 | PQ | 1.5 | 0.17 | 0.72 |
| *Eulaema cingulata* | 6 | PQ | 2 | 0.17 | 0.71 |
| *Eulaema cingulata* | 7 | P | 1.5 | 0.16 | 0.71 |
| *Eulaema flavescens* | 1 | P | 1.5 | 0.06 | 0.86 |
| *Eulaema flavescens* | 2 | Q | 2.5 | 0.06 | 0.86 |
| *Eulaema flavescens* | 3 | Q | 3 | 0.06 | 0.86 |
| *Eulaema flavescens* | 4 | P | 3 | 0.07 | 0.86 |
| *Eulaema flavescens* | 5 | P | 3.5 | 0.07 | 0.86 |
| *Eulaema flavescens* | 6 | P | 2.5 | 0.07 | 0.86 |
| *Eulaema flavescens* | 7 | Q | 3.5 | 0.06 | 0.86 |
| *Eulaema nigrita* | 1 | PQ | 1 | 0.09 | 0.76 |
| *Eulaema nigrita* | 2 | P | 1 | 0.08 | 0.75 |
| *Eulaema nigrita* | 3 | P | 0.5 | 0.11 | 0.75 |
| *Eulaema nigrita* | 4 | LP | 1 | 0.08 | 0.75 |
| *Eulaema nigrita* | 5 | P | 1.5 | 0.09 | 0.75 |
| *Eulaema nigrita* | 6 | LP | 1.5 | 0.09 | 0.75 |
| *Eulaema nigrita* | 7 | LP | 0.5 | 0.13 | 0.75 |
| *Exaerete smaragdina* | 1 | LP | 0.5 | 0.14 | 0.74 |
| *Exaerete smaragdina* | 2 | P | 0.5 | 0.12 | 0.74 |
| *Exaerete smaragdina* | 3 | P | 1 | 0.13 | 0.74 |
| *Exaerete smaragdina* | 4 | LP | 1 | 0.12 | 0.74 |
| *Exaerete smaragdina* | 5 | P | 1.5 | 0.14 | 0.74 |
| *Exaerete smaragdina* | 6 | P | 2 | 0.14 | 0.73 |
| *Exaerete smaragdina* | 7 | P | 2.5 | 0.14 | 0.72 |
| *Exomalopsis analis* | 1 | LQ | 1 | 0.21 | 0.77 |
| *Exomalopsis analis* | 2 | LQ | 1.5 | 0.2 | 0.77 |
| *Exomalopsis analis* | 3 | LQ | 0.5 | 0.19 | 0.77 |
| *Exomalopsis analis* | 4 | LQ | 2 | 0.2 | 0.77 |
| *Exomalopsis analis* | 5 | LQ | 2.5 | 0.19 | 0.77 |
| *Exomalopsis analis* | 6 | LQ | 3 | 0.2 | 0.77 |
| *Exomalopsis analis* | 7 | LQ | 3.5 | 0.2 | 0.76 |
| *Exomalopsis auropilosa* | 1 | L | 5 | 0.16 | 0.75 |
| *Exomalopsis auropilosa* | 2 | L | 0.5 | 0.17 | 0.76 |
| *Exomalopsis auropilosa* | 3 | L | 1 | 0.17 | 0.76 |
| *Exomalopsis auropilosa* | 4 | L | 1.5 | 0.16 | 0.76 |
| *Exomalopsis auropilosa* | 5 | L | 2 | 0.14 | 0.76 |
| *Exomalopsis auropilosa* | 6 | L | 2.5 | 0.16 | 0.76 |
| *Exomalopsis auropilosa* | 7 | L | 3 | 0.16 | 0.75 |
| *Friesella schrottkyi* | 1 | PQ | 2 | 0.03 | 0.71 |
| *Friesella schrottkyi* | 2 | LP | 2 | 0.03 | 0.7 |
| *Friesella schrottkyi* | 3 | L | 5 | 0.03 | 0.7 |
| *Friesella schrottkyi* | 4 | P | 2 | 0.08 | 0.7 |
| *Friesella schrottkyi* | 5 | LPQ | 2 | 0.08 | 0.7 |
| *Friesella schrottkyi* | 6 | LPQ | 2.5 | 0.08 | 0.7 |
| *Friesella schrottkyi* | 7 | PQ | 2.5 | 0.08 | 0.7 |
| *Leiopodus lacertinus* | 1 | LQ | 0.5 | 0.14 | 0.76 |
| *Leiopodus lacertinus* | 2 | P | 0.5 | 0.14 | 0.75 |
| *Leiopodus lacertinus* | 3 | Q | 0.5 | 0.14 | 0.75 |
| *Leiopodus lacertinus* | 4 | Q | 1 | 0.14 | 0.75 |
| *Leiopodus lacertinus* | 5 | Q | 1.5 | 0.12 | 0.75 |
| *Leiopodus lacertinus* | 6 | LQ | 1 | 0.14 | 0.75 |
| *Leiopodus lacertinus* | 7 | Q | 2 | 0.12 | 0.75 |
| *Leurotrigona muelleri* | 1 | LP | 4 | 0.05 | 0.74 |
| *Leurotrigona muelleri* | 2 | LP | 4.5 | 0.05 | 0.74 |
| *Leurotrigona muelleri* | 3 | LP | 5 | 0.05 | 0.74 |
| *Leurotrigona muelleri* | 4 | LP | 3.5 | 0.05 | 0.74 |
| *Leurotrigona muelleri* | 5 | P | 4 | 0.05 | 0.73 |
| *Leurotrigona muelleri* | 6 | P | 3.5 | 0.06 | 0.73 |
| *Leurotrigona muelleri* | 7 | LP | 3 | 0.05 | 0.73 |
| *Megalopta amoena* | 1 | LQ | 1 | 0 | 0.8 |
| *Megalopta amoena* | 2 | Q | 0.5 | 0 | 0.79 |
| *Megalopta amoena* | 3 | L | 0.5 | 0 | 0.79 |
| *Megalopta amoena* | 4 | L | 1 | 0 | 0.79 |
| *Megalopta amoena* | 5 | Q | 1 | 0 | 0.78 |
| *Megalopta amoena* | 6 | L | 1.5 | 0 | 0.78 |
| *Megalopta amoena* | 7 | LQ | 1.5 | 0 | 0.77 |
| *Melipona bicolor* | 1 | PQ | 4.5 | 0.14 | 0.77 |
| *Melipona bicolor* | 2 | PQ | 3.5 | 0.14 | 0.77 |
| *Melipona bicolor* | 3 | P | 4.5 | 0.11 | 0.77 |
| *Melipona bicolor* | 4 | P | 3.5 | 0.14 | 0.77 |
| *Melipona bicolor* | 5 | P | 4 | 0.13 | 0.77 |
| *Melipona bicolor* | 6 | LPQ | 3.5 | 0.14 | 0.77 |
| *Melipona bicolor* | 7 | P | 3 | 0.15 | 0.77 |
| *Melipona quadrifasciata* | 1 | L | 3.5 | 0.05 | 0.84 |
| *Melipona quadrifasciata* | 2 | L | 3 | 0.05 | 0.84 |
| *Melipona quadrifasciata* | 3 | L | 4 | 0.05 | 0.84 |
| *Melipona quadrifasciata* | 4 | L | 4.5 | 0.05 | 0.84 |
| *Melipona quadrifasciata* | 5 | L | 5 | 0.05 | 0.84 |
| *Melipona quadrifasciata* | 6 | Q | 3.5 | 0.08 | 0.84 |
| *Melipona quadrifasciata* | 7 | Q | 3 | 0.08 | 0.84 |
| *Melitoma segmentaria* | 1 | LQ | 0.5 | 0.19 | 0.73 |
| *Melitoma segmentaria* | 2 | LPQ | 5 | 0.18 | 0.72 |
| *Melitoma segmentaria* | 3 | LPQ | 4.5 | 0.17 | 0.72 |
| *Melitoma segmentaria* | 4 | PQ | 5 | 0.18 | 0.72 |
| *Melitoma segmentaria* | 5 | LP | 5 | 0.18 | 0.72 |
| *Melitoma segmentaria* | 6 | PQ | 4.5 | 0.17 | 0.72 |
| *Melitoma segmentaria* | 7 | LPQ | 4 | 0.17 | 0.72 |
| *Nannotrigona testaceicornis* | 1 | LQ | 2 | 0.06 | 0.88 |
| *Nannotrigona testaceicornis* | 2 | LQ | 2.5 | 0.06 | 0.88 |
| *Nannotrigona testaceicornis* | 3 | LPQ | 2 | 0.05 | 0.88 |
| *Nannotrigona testaceicornis* | 4 | LQ | 3 | 0.06 | 0.88 |
| *Nannotrigona testaceicornis* | 5 | LPQ | 2.5 | 0.05 | 0.88 |
| *Nannotrigona testaceicornis* | 6 | PQ | 2 | 0.05 | 0.88 |
| *Nannotrigona testaceicornis* | 7 | LQ | 3.5 | 0.06 | 0.88 |
| *Paratrigona subnuda* | 1 | LP | 0.5 | 0.07 | 0.8 |
| *Paratrigona subnuda* | 2 | LP | 1 | 0.07 | 0.79 |
| *Paratrigona subnuda* | 3 | L | 0.5 | 0.08 | 0.79 |
| *Paratrigona subnuda* | 4 | L | 1 | 0.08 | 0.79 |
| *Paratrigona subnuda* | 5 | LPQ | 1 | 0.08 | 0.79 |
| *Paratrigona subnuda* | 6 | P | 0.5 | 0.07 | 0.79 |
| *Paratrigona subnuda* | 7 | L | 1.5 | 0.08 | 0.79 |
| *Partamona helleri* | 1 | PQ | 1.5 | 0.12 | 0.82 |
| *Partamona helleri* | 2 | LPQ | 2 | 0.1 | 0.81 |
| *Partamona helleri* | 3 | LQ | 3 | 0.07 | 0.81 |
| *Partamona helleri* | 4 | PQ | 2 | 0.09 | 0.81 |
| *Partamona helleri* | 5 | P | 0.5 | 0.04 | 0.81 |
| *Partamona helleri* | 6 | P | 1 | 0.04 | 0.81 |
| *Partamona helleri* | 7 | P | 1.5 | 0.03 | 0.81 |
| *Plebeia droryana* | 1 | P | 2.5 | 0.04 | 0.8 |
| *Plebeia droryana* | 2 | P | 2 | 0.06 | 0.8 |
| *Plebeia droryana* | 3 | P | 1.5 | 0.06 | 0.79 |
| *Plebeia droryana* | 4 | P | 3 | 0.02 | 0.79 |
| *Plebeia droryana* | 5 | P | 1 | 0.06 | 0.79 |
| *Plebeia droryana* | 6 | LP | 4 | 0.03 | 0.79 |
| *Plebeia droryana* | 7 | LP | 2.5 | 0.06 | 0.79 |
| *Pseudaugochlora graminea* | 1 | LQ | 3 | 0.27 | 0.67 |
| *Scaptotrigona postica* | 1 | LQ | 2 | 0.18 | 0.78 |
| *Scaptotrigona postica* | 2 | LQ | 5 | 0.17 | 0.78 |
| *Scaptotrigona postica* | 3 | LQ | 2.5 | 0.18 | 0.78 |
| *Scaptotrigona postica* | 4 | LQ | 4.5 | 0.17 | 0.78 |
| *Scaptotrigona postica* | 5 | LQ | 3 | 0.17 | 0.78 |
| *Scaptotrigona postica* | 6 | LQ | 4 | 0.17 | 0.78 |
| *Scaptotrigona postica* | 7 | LQ | 1.5 | 0.19 | 0.78 |
| *Schwarziana quadripunctata* | 1 | Q | 5 | 0.12 | 0.78 |
| *Schwarziana quadripunctata* | 2 | Q | 4.5 | 0.12 | 0.78 |
| *Schwarziana quadripunctata* | 3 | Q | 4 | 0.12 | 0.78 |
| *Schwarziana quadripunctata* | 4 | Q | 3.5 | 0.12 | 0.78 |
| *Schwarziana quadripunctata* | 5 | Q | 3 | 0.12 | 0.78 |
| *Schwarziana quadripunctata* | 6 | Q | 2.5 | 0.12 | 0.78 |
| *Schwarziana quadripunctata* | 7 | Q | 2 | 0.12 | 0.77 |
| *Tetragonisca angustula* | 1 | PQ | 1 | 0.16 | 0.77 |
| *Tetragonisca angustula* | 2 | PQ | 1.5 | 0.15 | 0.76 |
| *Tetragonisca angustula* | 3 | PQ | 2 | 0.16 | 0.75 |
| *Tetragonisca angustula* | 4 | PQ | 4 | 0.16 | 0.75 |
| *Tetragonisca angustula* | 5 | LPQ | 4 | 0.17 | 0.75 |
| *Tetragonisca angustula* | 6 | PQ | 3.5 | 0.16 | 0.75 |
| *Tetragonisca angustula* | 7 | LPQ | 3.5 | 0.17 | 0.75 |
| *Thygater analis* | 1 | Q | 5 | 0.11 | 0.71 |
| *Thygater analis* | 2 | Q | 4.5 | 0.12 | 0.7 |
| *Thygater analis* | 3 | L | 5 | 0.08 | 0.7 |
| *Trigona branneri* | 1 | L | 1 | 0.12 | 0.58 |
| *Trigona fuscipennis* | 1 | L | 5 | 0.23 | 0.66 |
| *Trigona hyalinata* | 1 | LQ | 1.5 | 0.05 | 0.85 |
| *Trigona hyalinata* | 2 | LQ | 1 | 0.05 | 0.85 |
| *Trigona hyalinata* | 3 | LQ | 2 | 0.04 | 0.85 |
| *Trigona hyalinata* | 4 | LQ | 2.5 | 0.04 | 0.84 |
| *Trigona hyalinata* | 5 | LQ | 3 | 0.04 | 0.84 |
| *Trigona hyalinata* | 6 | LQ | 3.5 | 0.04 | 0.84 |
| *Trigona hyalinata* | 7 | LPQ | 2 | 0.05 | 0.84 |
| *Trigona spinipes* | 1 | Q | 4.5 | 0.07 | 0.83 |
| *Trigona spinipes* | 2 | Q | 4 | 0.07 | 0.83 |
| *Trigona spinipes* | 3 | Q | 3.5 | 0.08 | 0.83 |
| *Trigona spinipes* | 4 | Q | 3 | 0.07 | 0.83 |
| *Trigona spinipes* | 5 | Q | 2.5 | 0.08 | 0.83 |
| *Trigona spinipes* | 6 | Q | 2 | 0.07 | 0.83 |
| *Trigona spinipes* | 7 | Q | 1.5 | 0.07 | 0.82 |
| *Xylocopa muscaria* | 1 | LP | 1.5 | 0.13 | 0.52 |

## **Table S3.** Percentage contribution of variables selected for 48 native bee species across the Doce River Basin. Bioclimatic variables: Mean diurnal range (Bio2), Isothermality (Bio3), Temperature seasonality (Bio4), Max temperature of warmest month (Bio5), Temperature annual range (Bio7), Mean temperature of wettest quarter (Bio8), Mean temperature of driest quarter (Bio9), Mean temperature of warmest quarter (Bio10), Annual precipitation (Bio12), Precipitation of wettest month (Bio13), Precipitation of driest month (Bio14), Precipitation seasonality (Bio15), Precipitation of wettest quarter (Bio16), Precipitation of driest quarter (Bio17), Precipitation of warmest quarter (Bio18), and Precipitation of coldest quarter (Bio19).

| Species | Model | bio2 | bio3 | bio4 | bio5 | bio7 | bio8 | bio9 | bio10 | bio12 | bio13 | bio14 | bio15 | bio16 | bio17 | bio18 | bio19 |
| --- | --- | --- | --- | --- | --- | --- | --- | --- | --- | --- | --- | --- | --- | --- | --- | --- | --- |
| *Ancyloscelis apiformis* | 1 | 5.13 | 9.78 |  | 19.7 |  |  |  |  |  | 9.54 |  | 24.6 |  |  | 16.5 | 14.8 |
| *Ancyloscelis apiformis* | 2 | 4.8 | 9.24 |  | 20 |  |  |  |  |  | 9.78 |  | 25.7 |  |  | 17.3 | 13.3 |
| *Ancyloscelis apiformis* | 3 | 4.99 | 8.59 |  | 18.3 |  |  |  |  |  | 11.5 |  | 25.3 |  |  | 13.9 | 17.4 |
| *Bombus morio* | 1 | 8.27 | 43.5 |  | 17.1 |  |  |  |  |  |  |  | 1.07 |  |  | 24.6 | 5.51 |
| *Bombus morio* | 2 | 8.46 | 44.6 |  | 16.1 |  |  |  |  |  |  |  | 1.03 |  |  | 24.6 | 5.23 |
| *Bombus morio* | 3 | 19.3 | 44.4 |  | 18.9 |  |  |  |  |  |  |  | 4.33 |  |  | 11.9 | 1.14 |
| *Bombus morio* | 4 | 8.79 | 44 |  | 16.7 |  |  |  |  |  |  |  | 1.52 |  |  | 26.6 | 2.5 |
| *Bombus morio* | 5 | 19.4 | 44.7 |  | 19 |  |  |  |  |  |  |  | 4.27 |  |  | 11.6 | 1.09 |
| *Bombus morio* | 6 | 8.83 | 43.9 |  | 16.6 |  |  |  |  |  |  |  | 1.54 |  |  | 26.5 | 2.6 |
| *Bombus morio* | 7 | 19.9 | 45.4 |  | 19.1 |  |  |  |  |  |  |  | 3.8 |  |  | 10.9 | 0.96 |
| *Cephalotrigona capitata* | 1 | 14.8 |  | 44.8 | 15.8 |  |  |  |  |  | 12.1 |  | 4.86 |  |  | 6.86 | 0.83 |
| *Cephalotrigona capitata* | 2 | 15.4 |  | 44.4 | 16.7 |  |  |  |  |  | 11.7 |  | 5.07 |  |  | 6.36 | 0.43 |
| *Cephalotrigona capitata* | 3 | 16.4 |  | 43.3 | 16.8 |  |  |  |  |  | 8.98 |  | 5.13 |  |  | 9.18 | 0.29 |
| *Cephalotrigona capitata* | 4 | 16.9 |  | 45.1 | 11.6 |  |  |  |  |  | 10.2 |  | 6.67 |  |  | 8.21 | 1.37 |
| *Cephalotrigona capitata* | 5 | 16.9 |  | 45.6 | 12.3 |  |  |  |  |  | 9.77 |  | 6.77 |  |  | 7.79 | 0.91 |
| *Cephalotrigona capitata* | 6 | 16.5 |  | 46.4 | 12.5 |  |  |  |  |  | 9.23 |  | 6.75 |  |  | 8.04 | 0.66 |
| *Cephalotrigona capitata* | 7 | 15.7 |  | 45.4 | 16.6 |  |  |  |  |  | 8.22 |  | 4.67 |  |  | 9.06 | 0.38 |
| *Ceratina chloris* | 1 | 35.7 | 47.3 |  | 16 |  |  |  |  |  | 0.05 |  | 0.94 |  |  | 0.03 | 0.03 |
| *Ceratina chloris* | 2 | 39.1 | 49.4 |  | 11.5 |  |  |  |  |  | 0 |  | 0 |  |  | 0 | 0 |
| *Ceratina chloris* | 3 | 40 | 49.3 |  | 10.7 |  |  |  |  |  | 0 |  | 0 |  |  | 0 | 0 |
| *Ceratina chloris* | 4 | 36.8 | 47 |  | 13.9 |  |  |  |  |  | 1.63 |  | 0.29 |  |  | 0.02 | 0.32 |
| *Ceratina chloris* | 5 | 38.7 | 48.8 |  | 11.7 |  |  |  |  |  | 0 |  | 0.23 |  |  | 0.34 | 0.34 |
| *Ceratina chloris* | 6 | 41.2 | 49.8 |  | 8.98 |  |  |  |  |  | 0 |  | 0 |  |  | 0 | 0 |
| *Ceratina chloris* | 7 | 41.4 | 50 |  | 8.65 |  |  |  |  |  | 0 |  | 0 |  |  | 0 | 0 |
| *Eufriesea violacea* | 1 | 15.1 |  | 33.9 | 15.8 |  |  |  |  |  |  |  | 1.69 |  |  | 33.6 |  |
| *Eufriesea violacea* | 2 | 13.4 |  | 32.9 | 17.9 |  |  |  |  |  |  |  | 1.95 |  |  | 33.9 |  |
| *Eufriesea violacea* | 3 | 15.4 |  | 33.7 | 16.7 |  |  |  |  |  |  |  | 2.12 |  |  | 32.2 |  |
| *Eufriesea violacea* | 4 | 16.1 |  | 40.3 | 15.9 |  |  |  |  |  |  |  | 3.05 |  |  | 24.8 |  |
| *Eufriesea violacea* | 5 | 15.8 |  | 41.5 | 15.8 |  |  |  |  |  |  |  | 2.06 |  |  | 24.9 |  |
| *Eufriesea violacea* | 6 | 15.5 |  | 33.1 | 16.9 |  |  |  |  |  |  |  | 2.53 |  |  | 32 |  |
| *Eufriesea violacea* | 7 | 13 |  | 35.7 | 14.3 |  |  |  |  |  |  |  | 0.48 |  |  | 36.5 |  |
| *Eufriesea violascens* | 1 | 0 | 10.5 |  |  | 0 | 0 |  | 80.7 | 8.83 |  |  |  |  |  | 0 |  |
| *Euglossa amazonica* | 1 | 77.4 |  | 0 | 1.17 |  |  |  |  |  | 0.41 |  | 0.43 |  |  | 0 | 20.6 |
| *Euglossa amazonica* | 2 | 79.1 |  | 0 | 0.9 |  |  |  |  |  | 0.18 |  | 0.19 |  |  | 0 | 19.7 |
| *Euglossa amazonica* | 3 | 79.7 |  | 0 | 0.71 |  |  |  |  |  | 0.27 |  | 0 |  |  | 0 | 19.3 |
| *Euglossa amazonica* | 4 | 81.2 |  | 0 | 0.48 |  |  |  |  |  | 0 |  | 0.11 |  |  | 0 | 18.2 |
| *Euglossa amazonica* | 5 | 82.2 |  | 0 | 0.84 |  |  |  |  |  | 0.14 |  | 0 |  |  | 0 | 16.8 |
| *Euglossa amazonica* | 6 | 94.6 |  | 0 | 0.33 |  |  |  |  |  | 0.01 |  | 0 |  |  | 0 | 5.09 |
| *Euglossa amazonica* | 7 | 74.6 |  | 0 | 3.21 |  |  |  |  |  | 0.57 |  | 0.3 |  |  | 0.38 | 21 |
| *Euglossa analis* | 1 | 96.6 |  |  |  |  | 3.41 |  |  |  | 0 |  | 0 |  |  | 0 | 0 |
| *Euglossa analis* | 2 | 86.5 |  |  |  |  | 13.48 |  |  |  | 0 |  | 0 |  |  | 0 | 0 |
| *Euglossa analis* | 3 | 96.6 |  |  |  |  | 3.41 |  |  |  | 0 |  | 0 |  |  | 0 | 0 |
| *Euglossa analis* | 4 | 50 |  |  |  |  | 44.73 |  |  |  | 0 |  | 5.27 |  |  | 0 | 0 |
| *Euglossa analis* | 5 | 96.1 |  |  |  |  | 3.87 |  |  |  | 0 |  | 0 |  |  | 0 | 0 |
| *Euglossa analis* | 6 | 88.8 |  |  |  |  | 11.2 |  |  |  | 0 |  | 0 |  |  | 0 | 0 |
| *Euglossa analis* | 7 | 96.1 |  |  |  |  | 3.87 |  |  |  | 0 |  | 0 |  |  | 0 | 0 |
| *Euglossa annectans* | 1 | 98.5 | 0 |  |  | 0.93 | 0.27 |  |  | 0.27 |  |  |  |  |  | 0 |  |
| *Euglossa carolina* | 1 |  | 0 |  | 42.7 |  |  |  |  |  | 0.88 |  | 23.4 |  |  | 33.1 |  |
| *Euglossa carolina* | 2 |  | 0 |  | 45 |  |  |  |  |  | 0.7 |  | 18 |  |  | 36.3 |  |
| *Euglossa carolina* | 3 |  | 0 |  | 41.5 |  |  |  |  |  | 1.06 |  | 23.8 |  |  | 33.6 |  |
| *Euglossa carolina* | 4 |  | 0.05 |  | 44.3 |  |  |  |  |  | 2.37 |  | 23 |  |  | 30.4 |  |
| *Euglossa carolina* | 5 |  | 0.01 |  | 43.2 |  |  |  |  |  | 2.43 |  | 23.5 |  |  | 30.9 |  |
| *Euglossa carolina* | 6 |  | 0.02 |  | 46.8 |  |  |  |  |  | 2.54 |  | 18.2 |  |  | 32.5 |  |
| *Euglossa carolina* | 7 |  | 0 |  | 16.5 |  |  |  |  |  | 2.03 |  | 18.3 |  |  | 63.2 |  |
| *Euglossa cordata* | 1 | 43.8 | 53.5 |  | 0.48 |  |  |  |  |  | 0.35 |  | 0.11 |  |  | 0.67 | 1.14 |
| *Euglossa cordata* | 2 | 43.1 | 50.4 |  | 1.6 |  |  |  |  |  | 1.52 |  | 0.62 |  |  | 1.1 | 1.69 |
| *Euglossa cordata* | 3 | 42.3 | 50.1 |  | 2.36 |  |  |  |  |  | 1.39 |  | 0.74 |  |  | 1.27 | 1.88 |
| *Euglossa cordata* | 4 | 41.8 | 48.8 |  | 2.88 |  |  |  |  |  | 1.59 |  | 0.78 |  |  | 1.95 | 2.17 |
| *Euglossa cordata* | 5 | 42.5 | 48.6 |  | 2.16 |  |  |  |  |  | 2.13 |  | 0.8 |  |  | 1.49 | 2.29 |
| *Euglossa cordata* | 6 | 42.4 | 48 |  | 1.34 |  |  |  |  |  | 1.76 |  | 1 |  |  | 3.08 | 2.4 |
| *Euglossa cordata* | 7 | 42.5 | 49.4 |  | 1.54 |  |  |  |  |  | 1.41 |  | 0.74 |  |  | 2.38 | 2.05 |
| *Euglossa crassipunctata* | 1 | 71.1 |  | 0.96 | 4.5 |  |  |  |  |  | 1.61 | 6.66 |  |  |  | 11.3 | 3.85 |
| *Euglossa crassipunctata* | 2 | 75.8 |  | 0.87 | 4.5 |  |  |  |  |  | 0.3 | 5.04 |  |  |  | 9.4 | 4.12 |
| *Euglossa crassipunctata* | 3 | 73.7 |  | 1.08 | 4.6 |  |  |  |  |  | 0.46 | 5.42 |  |  |  | 10.1 | 4.68 |
| *Euglossa crassipunctata* | 4 | 37.9 |  | 1.66 | 43.6 |  |  |  |  |  | 0.79 | 6.92 |  |  |  | 4.74 | 4.42 |
| *Euglossa crassipunctata* | 5 | 38.5 |  | 0.58 | 43.3 |  |  |  |  |  | 0.82 | 7.3 |  |  |  | 5.3 | 4.22 |
| *Euglossa crassipunctata* | 6 | 68.3 |  | 0.92 | 10.4 |  |  |  |  |  | 1.9 | 6.07 |  |  |  | 9.6 | 2.84 |
| *Euglossa fimbriata* | 1 | 36.2 | 39.2 |  |  |  | 2.89 |  |  |  | 0 |  |  |  |  | 21.7 | 0 |
| *Euglossa fimbriata* | 2 | 36.4 | 45.4 |  |  |  | 9.56 |  |  |  | 0 |  |  |  |  | 8.68 | 0 |
| *Euglossa fimbriata* | 3 | 36 | 45.3 |  |  |  | 9.98 |  |  |  | 0 |  |  |  |  | 8.7 | 0 |
| *Euglossa fimbriata* | 4 | 35.7 | 38.8 |  |  |  | 2.96 |  |  |  | 0 |  |  |  |  | 22.5 | 0 |
| *Euglossa fimbriata* | 5 | 36.6 | 39.4 |  |  |  | 0.38 |  |  |  | 0 |  |  |  |  | 23.6 | 0 |
| *Euglossa fimbriata* | 6 | 35.9 | 44.4 |  |  |  | 10.43 |  |  |  | 0 |  |  |  |  | 9.24 | 0 |
| *Euglossa fimbriata* | 7 | 35 | 41.9 |  |  |  | 13.39 |  |  |  | 0 |  |  |  |  | 9.65 | 0 |
| *Euglossa leucotricha* | 1 | 0.42 |  | 0.01 |  |  | 99.57 |  |  |  | 0 |  |  |  |  |  | 0 |
| *Euglossa leucotricha* | 2 | 0.8 |  | 0 |  |  | 99.2 |  |  |  | 0 |  |  |  |  |  | 0 |
| *Euglossa leucotricha* | 3 | 0.05 |  | 0 |  |  | 99.95 |  |  |  | 0 |  |  |  |  |  | 0 |
| *Euglossa leucotricha* | 4 | 3.53 |  | 0.01 |  |  | 95.8 |  |  |  | 0.6 |  |  |  |  |  | 0.06 |
| *Euglossa leucotricha* | 5 | 0 |  | 0 |  |  | 100 |  |  |  | 0 |  |  |  |  |  | 0 |
| *Euglossa leucotricha* | 6 | 2.41 |  | 0 |  |  | 97.59 |  |  |  | 0 |  |  |  |  |  | 0 |
| *Euglossa leucotricha* | 7 | 7.74 |  | 2.21 |  |  | 86.04 |  |  |  | 1.69 |  |  |  |  |  | 2.33 |
| *Euglossa pleosticta* | 1 | 4.93 |  | 47.3 | 26.9 |  |  |  |  |  | 5.58 |  | 5.3 |  |  | 7.87 | 2.16 |
| *Euglossa pleosticta* | 2 | 6.73 |  | 29.6 | 20 |  |  |  |  |  | 9.54 |  | 8.07 |  |  | 25.3 | 0.78 |
| *Euglossa pleosticta* | 3 | 4.51 |  | 45.5 | 29.5 |  |  |  |  |  | 4.53 |  | 6.79 |  |  | 7.78 | 1.34 |
| *Euglossa pleosticta* | 4 | 4.22 |  | 29.2 | 23.7 |  |  |  |  |  | 4.44 |  | 10.9 |  |  | 24 | 3.48 |
| *Euglossa pleosticta* | 5 | 2.58 |  | 50.6 | 24.7 |  |  |  |  |  | 5.68 |  | 5.83 |  |  | 10.4 | 0.3 |
| *Euglossa pleosticta* | 6 | 6.33 |  | 51.5 | 20.3 |  |  |  |  |  | 3.58 |  | 5.38 |  |  | 10.8 | 2.1 |
| *Euglossa pleosticta* | 7 | 2.92 |  | 50.2 | 24.3 |  |  |  |  |  | 5.89 |  | 5.8 |  |  | 10.5 | 0.37 |
| *Euglossa securigera* | 1 | 12.9 | 74.5 |  | 9.11 |  |  |  |  |  | 0.6 |  | 0.2 |  |  | 1.14 | 1.52 |
| *Euglossa securigera* | 2 | 13.8 | 76.6 |  | 7.83 |  |  |  |  |  | 0.32 |  | 0.19 |  |  | 1 | 0.29 |
| *Euglossa securigera* | 3 | 12.9 | 78.7 |  | 7.55 |  |  |  |  |  | 0.17 |  | 0.1 |  |  | 0.58 | 0 |
| *Euglossa securigera* | 4 | 12 | 78.9 |  | 8.44 |  |  |  |  |  | 0.01 |  | 0.03 |  |  | 0.6 | 0.02 |
| *Euglossa securigera* | 5 | 11 | 78.4 |  | 10.2 |  |  |  |  |  | 0 |  | 0.01 |  |  | 0.43 | 0 |
| *Euglossa securigera* | 6 | 10.6 | 78.8 |  | 10.3 |  |  |  |  |  | 0 |  | 0 |  |  | 0.35 | 0 |
| *Euglossa securigera* | 7 | 13.4 | 47 |  | 32.7 |  |  |  |  |  | 0.39 |  | 2.36 |  |  | 2.93 | 1.25 |
| *Euglossa stellfeldi* | 1 |  |  | 0 |  | 0 |  |  | 50 |  |  |  |  | 50 |  |  |  |
| *Euglossa stellfeldi* | 2 |  |  | 0 |  | 0 |  |  | 50 |  |  |  |  | 50 |  |  |  |
| *Euglossa stellfeldi* | 3 |  |  | 0 |  | 0 |  |  | 50 |  |  |  |  | 50 |  |  |  |
| *Euglossa stellfeldi* | 4 |  |  | 0 |  | 13.8 |  |  | 47.6 |  |  |  |  | 38.65 |  |  |  |
| *Euglossa stellfeldi* | 5 |  |  | 0 |  | 13.3 |  |  | 49 |  |  |  |  | 37.79 |  |  |  |
| *Euglossa townsendi* | 1 | 1.67 | 1.52 |  | 12.7 |  |  |  |  |  | 57.5 |  | 24.6 |  |  | 1.48 | 0.58 |
| *Euglossa truncata* | 1 | 0 |  |  |  |  | 0 |  |  |  |  |  |  | 100 |  |  | 0 |
| *Euglossa violaceifrons* | 1 |  | 11.1 | 3.04 | 35.4 |  |  |  |  | 26.4 |  | 24 |  |  |  |  | 0 |
| *Euglossa violaceifrons* | 2 |  | 8 | 1.18 | 41.3 |  |  |  |  | 31.7 |  | 17.9 |  |  |  |  | 0 |
| *Euglossa violaceifrons* | 3 |  | 8.56 | 3.68 | 47.7 |  |  |  |  | 17.4 |  | 22.7 |  |  |  |  | 0 |
| *Euglossa violaceifrons* | 4 |  | 7.17 | 3.06 | 49.3 |  |  |  |  | 18.3 |  | 22.2 |  |  |  |  | 0 |
| *Euglossa violaceifrons* | 5 |  | 8.02 | 13.4 | 51.4 |  |  |  |  | 18.8 |  | 8.44 |  |  |  |  | 0 |
| *Euglossa violaceifrons* | 6 |  | 8.05 | 20.8 | 37.9 |  |  |  |  | 23.4 |  | 9.17 |  |  |  |  | 0.68 |
| *Euglossa violaceifrons* | 7 |  | 9.87 | 2.6 | 33.4 |  |  |  |  | 30.4 |  | 23.7 |  |  |  |  | 0 |
| *Eulaema cingulata* | 1 | 11.8 | 2.84 |  | 21 |  |  |  |  |  | 25.1 |  | 18.3 |  |  | 15.5 | 5.48 |
| *Eulaema cingulata* | 2 | 7.54 | 2.14 |  | 21.3 |  |  |  |  |  | 44.1 |  | 2.37 |  |  | 13.2 | 9.42 |
| *Eulaema cingulata* | 3 | 13.8 | 2.74 |  | 18 |  |  |  |  |  | 26.7 |  | 19.6 |  |  | 15.3 | 3.84 |
| *Eulaema cingulata* | 4 | 12.7 | 3.13 |  | 15.4 |  |  |  |  |  | 30 |  | 21.5 |  |  | 13.5 | 3.75 |
| *Eulaema cingulata* | 5 | 15.1 | 1.67 |  | 15.4 |  |  |  |  |  | 30.3 |  | 20.2 |  |  | 14.2 | 3.18 |
| *Eulaema cingulata* | 6 | 15.7 | 1.46 |  | 17.2 |  |  |  |  |  | 30.7 |  | 21 |  |  | 11.6 | 2.28 |
| *Eulaema cingulata* | 7 | 15.5 | 7.61 |  | 14.5 |  |  |  |  |  | 24.6 |  | 25.5 |  |  | 10.1 | 2.19 |
| *Eulaema flavescens* | 1 | 26.2 | 2.49 | 4.59 | 10.8 |  |  |  |  |  | 26.8 |  | 25.8 |  |  | 3.32 |  |
| *Eulaema flavescens* | 2 | 3.5 | 0.1 | 2.91 | 12 |  |  |  |  |  | 36.9 |  | 42.4 |  |  | 2.18 |  |
| *Eulaema flavescens* | 3 | 3.47 | 0.04 | 2.66 | 12.3 |  |  |  |  |  | 36.7 |  | 42.8 |  |  | 2 |  |
| *Eulaema flavescens* | 4 | 25.1 | 1.06 | 2.99 | 13.2 |  |  |  |  |  | 27.8 |  | 27.8 |  |  | 2.08 |  |
| *Eulaema flavescens* | 5 | 26.2 | 2.47 | 3.52 | 9.44 |  |  |  |  |  | 27.1 |  | 29 |  |  | 2.29 |  |
| *Eulaema flavescens* | 6 | 26.8 | 1.26 | 2.23 | 10.2 |  |  |  |  |  | 27.4 |  | 29.5 |  |  | 2.65 |  |
| *Eulaema flavescens* | 7 | 3.47 | 0.03 | 2.17 | 12.4 |  |  |  |  |  | 36.5 |  | 43.5 |  |  | 1.97 |  |
| *Eulaema nigrita* | 1 | 20.2 |  | 21.6 | 15.9 |  |  |  |  |  | 13.3 |  | 4.77 |  |  | 21.7 | 2.54 |
| *Eulaema nigrita* | 2 | 22.3 |  | 18.9 | 17.7 |  |  |  |  |  | 20.1 |  | 5.36 |  |  | 11.9 | 3.81 |
| *Eulaema nigrita* | 3 | 20.8 |  | 17.4 | 16.3 |  |  |  |  |  | 20.7 |  | 6.42 |  |  | 13.7 | 4.75 |
| *Eulaema nigrita* | 4 | 25.2 |  | 17.8 | 17 |  |  |  |  |  | 20.5 |  | 5.09 |  |  | 11 | 3.42 |
| *Eulaema nigrita* | 5 | 22.8 |  | 19.6 | 19.5 |  |  |  |  |  | 19.1 |  | 4.58 |  |  | 11.6 | 2.79 |
| *Eulaema nigrita* | 6 | 25.9 |  | 18.6 | 17.8 |  |  |  |  |  | 19.8 |  | 4.49 |  |  | 10.5 | 2.86 |
| *Eulaema nigrita* | 7 | 23.6 |  | 16 | 17.8 |  |  |  |  |  | 20 |  | 5.59 |  |  | 11.7 | 5.26 |
| *Exaerete smaragdina* | 1 | 16.9 | 3.13 |  | 5.55 |  |  |  |  |  | 56.7 |  | 7.38 |  |  | 6.75 | 3.57 |
| *Exaerete smaragdina* | 2 | 15.9 | 9.11 |  | 26.1 |  |  |  |  |  | 29.3 |  | 10.3 |  |  | 6.37 | 2.91 |
| *Exaerete smaragdina* | 3 | 16 | 9.05 |  | 27.1 |  |  |  |  |  | 30.1 |  | 10.7 |  |  | 5.24 | 1.74 |
| *Exaerete smaragdina* | 4 | 16.2 | 3.5 |  | 4.63 |  |  |  |  |  | 62.1 |  | 5.65 |  |  | 5.32 | 2.67 |
| *Exaerete smaragdina* | 5 | 15.7 | 9.58 |  | 28 |  |  |  |  |  | 30.2 |  | 9.84 |  |  | 4.79 | 1.89 |
| *Exaerete smaragdina* | 6 | 15 | 10.1 |  | 29.5 |  |  |  |  |  | 30.9 |  | 9.03 |  |  | 3.6 | 1.83 |
| *Exaerete smaragdina* | 7 | 15.1 | 10 |  | 30.4 |  |  |  |  |  | 31.5 |  | 8.94 |  |  | 2.84 | 1.14 |
| *Exomalopsis analis* | 1 | 2.15 | 20.6 |  | 3.02 |  |  |  |  |  | 35.3 |  | 10.4 |  |  | 3.51 | 25 |
| *Exomalopsis analis* | 2 | 1.25 | 21.6 |  | 1.55 |  |  |  |  |  | 35.6 |  | 11 |  |  | 3.47 | 25.6 |
| *Exomalopsis analis* | 3 | 2.84 | 19.4 |  | 4.12 |  |  |  |  |  | 37.1 |  | 9.78 |  |  | 3.81 | 23 |
| *Exomalopsis analis* | 4 | 1.54 | 21.6 |  | 1.19 |  |  |  |  |  | 36.5 |  | 10.9 |  |  | 2.67 | 25.7 |
| *Exomalopsis analis* | 5 | 1.03 | 21.9 |  | 1.16 |  |  |  |  |  | 36.5 |  | 11 |  |  | 2.51 | 25.9 |
| *Exomalopsis analis* | 6 | 0.31 | 22.5 |  | 0.73 |  |  |  |  |  | 37.3 |  | 11.3 |  |  | 2.12 | 25.7 |
| *Exomalopsis analis* | 7 | 0.27 | 22.8 |  | 0.86 |  |  |  |  |  | 39 |  | 11 |  |  | 1.39 | 24.7 |
| *Exomalopsis auropilosa* | 1 | 5.43 |  | 59.3 |  |  | 12.99 |  |  |  | 0.15 |  | 11.8 |  |  | 10.3 | 0 |
| *Exomalopsis auropilosa* | 2 | 12.9 |  | 46.4 |  |  | 10.38 |  |  |  | 1.8 |  | 16.4 |  |  | 11.3 | 0.74 |
| *Exomalopsis auropilosa* | 3 | 12.5 |  | 48.1 |  |  | 10.94 |  |  |  | 1.17 |  | 16 |  |  | 10.9 | 0.37 |
| *Exomalopsis auropilosa* | 4 | 12 |  | 49.8 |  |  | 11.3 |  |  |  | 0.56 |  | 15.4 |  |  | 10.9 | 0.08 |
| *Exomalopsis auropilosa* | 5 | 11.2 |  | 51.2 |  |  | 11.53 |  |  |  | 0.87 |  | 14.7 |  |  | 10.6 | 0 |
| *Exomalopsis auropilosa* | 6 | 10.3 |  | 52.2 |  |  | 12.2 |  |  |  | 0.93 |  | 13.9 |  |  | 10.5 | 0 |
| *Exomalopsis auropilosa* | 7 | 8.97 |  | 53.4 |  |  | 12.64 |  |  |  | 0.75 |  | 14.1 |  |  | 10.2 | 0 |
| *Friesella schrottkyi* | 1 | 38.2 | 19.9 |  |  | 17.4 | 21.71 |  |  |  |  |  |  | 0 |  | 2.81 |  |
| *Friesella schrottkyi* | 2 | 48.8 | 12.8 |  |  | 6.61 | 25.34 |  |  |  |  |  |  | 0 |  | 6.46 |  |
| *Friesella schrottkyi* | 3 | 79.3 | 0 |  |  | 0.06 | 9.8 |  |  |  |  |  |  | 0 |  | 10.8 |  |
| *Friesella schrottkyi* | 4 | 43.5 | 20.6 |  |  | 7.85 | 25.3 |  |  |  |  |  |  | 0 |  | 2.7 |  |
| *Friesella schrottkyi* | 5 | 51.7 | 12.8 |  |  | 8.87 | 21.28 |  |  |  |  |  |  | 0 |  | 5.39 |  |
| *Friesella schrottkyi* | 6 | 46.4 | 18.7 |  |  | 11.4 | 15.95 |  |  |  |  |  |  | 0 |  | 7.5 |  |
| *Friesella schrottkyi* | 7 | 56.9 | 15.9 |  |  | 4.06 | 19.83 |  |  |  |  |  |  | 0 |  | 3.29 |  |
| *Leiopodus lacertinus* | 1 | 76.9 | 2.76 |  |  |  |  |  | 0.13 |  |  |  | 15.3 |  |  | 4.96 |  |
| *Leiopodus lacertinus* | 2 | 42 | 28.4 |  |  |  |  |  | 18 |  |  |  | 6.86 |  |  | 4.7 |  |
| *Leiopodus lacertinus* | 3 | 80.1 | 2.27 |  |  |  |  |  | 0 |  |  |  | 12.6 |  |  | 5.04 |  |
| *Leiopodus lacertinus* | 4 | 82.1 | 1.28 |  |  |  |  |  | 0 |  |  |  | 12.1 |  |  | 4.48 |  |
| *Leiopodus lacertinus* | 5 | 82.4 | 0.47 |  |  |  |  |  | 0 |  |  |  | 13 |  |  | 4.08 |  |
| *Leiopodus lacertinus* | 6 | 80.1 | 2.3 |  |  |  |  |  | 0.02 |  |  |  | 13.1 |  |  | 4.54 |  |
| *Leiopodus lacertinus* | 7 | 85.7 | 0.17 |  |  |  |  |  | 0 |  |  |  | 11.2 |  |  | 2.91 |  |
| *Leurotrigona muelleri* | 1 | 13 | 0.17 |  | 4.02 |  |  |  |  |  | 1.34 |  | 32 |  |  | 32.8 | 16.7 |
| *Leurotrigona muelleri* | 2 | 13.1 | 1.58 |  | 3.98 |  |  |  |  |  | 0 |  | 32 |  |  | 32.6 | 16.8 |
| *Leurotrigona muelleri* | 3 | 13.3 | 1.29 |  | 3.56 |  |  |  |  |  | 0 |  | 32.2 |  |  | 32.7 | 16.9 |
| *Leurotrigona muelleri* | 4 | 13.2 | 0.48 |  | 4.53 |  |  |  |  |  | 1.35 |  | 31.5 |  |  | 32.3 | 16.6 |
| *Leurotrigona muelleri* | 5 | 13.9 | 1.48 |  | 4.29 |  |  |  |  |  | 0 |  | 31.3 |  |  | 31.9 | 17.2 |
| *Leurotrigona muelleri* | 6 | 13.7 | 1.63 |  | 4.36 |  |  |  |  |  | 0 |  | 30.8 |  |  | 32 | 17.4 |
| *Leurotrigona muelleri* | 7 | 13.1 | 0.52 |  | 6.85 |  |  |  |  |  | 0.98 |  | 29.9 |  |  | 31 | 17.6 |
| *Megalopta amoena* | 1 |  | 8.84 |  | 12 |  |  |  |  |  | 11.3 |  | 67.8 |  |  |  |  |
| *Megalopta amoena* | 2 |  | 9.58 |  | 12 |  |  |  |  |  | 10.5 |  | 67.9 |  |  |  |  |
| *Megalopta amoena* | 3 |  | 16.4 |  | 6.98 |  |  |  |  |  | 18.7 |  | 57.9 |  |  |  |  |
| *Megalopta amoena* | 4 |  | 12.4 |  | 9.25 |  |  |  |  |  | 15.4 |  | 63.1 |  |  |  |  |
| *Megalopta amoena* | 5 |  | 5.45 |  | 14.4 |  |  |  |  |  | 6.5 |  | 73.6 |  |  |  |  |
| *Megalopta amoena* | 6 |  | 9.62 |  | 11 |  |  |  |  |  | 11.6 |  | 67.8 |  |  |  |  |
| *Megalopta amoena* | 7 |  | 5.52 |  | 14.6 |  |  |  |  |  | 6.89 |  | 73 |  |  |  |  |
| *Melipona bicolor* | 1 | 34.2 | 1 |  | 40.4 | 21.1 | 0 | 0 |  | 0.43 |  |  |  |  |  | 2.91 |  |
| *Melipona bicolor* | 2 | 31.9 | 1.45 |  | 38.5 | 20.3 | 0 | 0 |  | 0.59 |  |  |  |  |  | 7.34 |  |
| *Melipona bicolor* | 3 | 32.7 | 0.54 |  | 43.7 | 21.9 | 0 | 0 |  | 0.59 |  |  |  |  |  | 0.55 |  |
| *Melipona bicolor* | 4 | 31.7 | 0.11 |  | 41.2 | 20.2 | 0 | 0 |  | 3.48 |  |  |  |  |  | 3.37 |  |
| *Melipona bicolor* | 5 | 32.4 | 0.06 |  | 41.7 | 21 | 0 | 0 |  | 2.44 |  |  |  |  |  | 2.37 |  |
| *Melipona bicolor* | 6 | 29.8 | 3.1 |  | 33.1 | 24.6 | 1.19 | 0 |  | 2.23 |  |  |  |  |  | 5.99 |  |
| *Melipona bicolor* | 7 | 32 | 0.84 |  | 44.1 | 19.9 | 0 | 0 |  | 0.91 |  |  |  |  |  | 2.25 |  |
| *Melipona quadrifasciata* | 1 | 18.4 |  |  |  | 0 | 0.33 | 36.3 | 23.9 | 0 |  |  |  | 19.33 |  |  | 1.75 |
| *Melipona quadrifasciata* | 2 | 18.5 |  |  |  | 0.01 | 0.29 | 35.8 | 24.2 | 0 |  |  |  | 19.25 |  |  | 2 |
| *Melipona quadrifasciata* | 3 | 18.3 |  |  |  | 0 | 0.28 | 36.4 | 24 | 0 |  |  |  | 19.34 |  |  | 1.67 |
| *Melipona quadrifasciata* | 4 | 18.1 |  |  |  | 0 | 0.27 | 36.3 | 24 | 0 |  |  |  | 19.77 |  |  | 1.56 |
| *Melipona quadrifasciata* | 5 | 18 |  |  |  | 0 | 0.23 | 36.4 | 24.1 | 0 |  |  |  | 19.77 |  |  | 1.49 |
| *Melipona quadrifasciata* | 6 | 19.7 |  |  |  | 0 | 0.24 | 37.3 | 23.9 | 0 |  |  |  | 16.85 |  |  | 1.93 |
| *Melipona quadrifasciata* | 7 | 20.1 |  |  |  | 0 | 0.26 | 36.7 | 23.8 | 0 |  |  |  | 17.27 |  |  | 1.91 |
| *Melitoma segmentaria* | 1 | 30.2 | 41 |  | 15 |  |  |  |  |  | 1.97 |  | 6.53 |  |  | 2.14 | 3.25 |
| *Melitoma segmentaria* | 2 | 36.1 | 48.7 |  | 5.97 |  |  |  |  |  | 0.7 |  | 5.13 |  |  | 0.32 | 3.1 |
| *Melitoma segmentaria* | 3 | 36.2 | 49.3 |  | 5.89 |  |  |  |  |  | 0.67 |  | 4.15 |  |  | 0.29 | 3.56 |
| *Melitoma segmentaria* | 4 | 35.3 | 48.1 |  | 6.08 |  |  |  |  |  | 0.69 |  | 5.85 |  |  | 0.53 | 3.42 |
| *Melitoma segmentaria* | 5 | 37.7 | 48.6 |  | 4.12 |  |  |  |  |  | 1.11 |  | 4.24 |  |  | 0.01 | 4.21 |
| *Melitoma segmentaria* | 6 | 35.6 | 49.8 |  | 5.65 |  |  |  |  |  | 0.57 |  | 5.08 |  |  | 0.36 | 2.95 |
| *Melitoma segmentaria* | 7 | 35.6 | 47.1 |  | 7.15 |  |  |  |  |  | 0.88 |  | 5.7 |  |  | 0.32 | 3.26 |
| *Nannotrigona testaceicornis* | 1 | 10.8 | 39.1 |  | 19.1 |  |  |  |  |  | 0.69 |  | 4.96 |  |  | 13.7 | 11.7 |
| *Nannotrigona testaceicornis* | 2 | 11.1 | 40.1 |  | 18.7 |  |  |  |  |  | 0.79 |  | 4.66 |  |  | 13 | 11.8 |
| *Nannotrigona testaceicornis* | 3 | 13.4 | 38.4 |  | 21.2 |  |  |  |  |  | 1.85 |  | 8.46 |  |  | 9.35 | 7.31 |
| *Nannotrigona testaceicornis* | 4 | 10.6 | 41 |  | 18.5 |  |  |  |  |  | 0.54 |  | 3.15 |  |  | 12.8 | 13.5 |
| *Nannotrigona testaceicornis* | 5 | 12.3 | 39.5 |  | 20.6 |  |  |  |  |  | 1.61 |  | 7.64 |  |  | 11.2 | 7.18 |
| *Nannotrigona testaceicornis* | 6 | 12 | 39.3 |  | 20.1 |  |  |  |  |  | 1.98 |  | 9.3 |  |  | 9.99 | 7.34 |
| *Nannotrigona testaceicornis* | 7 | 10.3 | 41.4 |  | 18.9 |  |  |  |  |  | 0.47 |  | 2.99 |  |  | 12.6 | 13.3 |
| *Paratrigona subnuda* | 1 | 36 |  |  |  |  | 34.81 |  |  |  |  |  | 2.24 | 26.99 |  |  |  |
| *Paratrigona subnuda* | 2 | 36.7 |  |  |  |  | 36.57 |  |  |  |  |  | 0.61 | 26.12 |  |  |  |
| *Paratrigona subnuda* | 3 | 44.1 |  |  |  |  | 27.43 |  |  |  |  |  | 2.84 | 25.68 |  |  |  |
| *Paratrigona subnuda* | 4 | 44.4 |  |  |  |  | 27.66 |  |  |  |  |  | 2.29 | 25.71 |  |  |  |
| *Paratrigona subnuda* | 5 | 38.3 |  |  |  |  | 35.74 |  |  |  |  |  | 0.8 | 25.22 |  |  |  |
| *Paratrigona subnuda* | 6 | 41.4 |  |  |  |  | 44.38 |  |  |  |  |  | 5.03 | 9.19 |  |  |  |
| *Paratrigona subnuda* | 7 | 44.7 |  |  |  |  | 27.87 |  |  |  |  |  | 1.79 | 25.67 |  |  |  |
| *Partamona helleri* | 1 | 30.9 |  |  |  |  | 28.82 |  |  |  | 32.6 |  |  |  |  |  | 7.72 |
| *Partamona helleri* | 2 | 31.1 |  |  |  |  | 28.89 |  |  |  | 32.6 |  |  |  |  |  | 7.45 |
| *Partamona helleri* | 3 | 32.8 |  |  |  |  | 6.73 |  |  |  | 54.6 |  |  |  |  |  | 5.81 |
| *Partamona helleri* | 4 | 31.3 |  |  |  |  | 29.58 |  |  |  | 31.9 |  |  |  |  |  | 7.2 |
| *Partamona helleri* | 5 | 11.4 |  |  |  |  | 41.71 |  |  |  | 41.8 |  |  |  |  |  | 5.09 |
| *Partamona helleri* | 6 | 11.2 |  |  |  |  | 42.28 |  |  |  | 41.9 |  |  |  |  |  | 4.64 |
| *Partamona helleri* | 7 | 11.4 |  |  |  |  | 42.81 |  |  |  | 41.9 |  |  |  |  |  | 3.89 |
| *Plebeia droryana* | 1 | 34.1 |  |  |  | 8.75 |  |  | 34.4 |  |  |  |  | 3.36 |  | 15 | 4.43 |
| *Plebeia droryana* | 2 | 32.7 |  |  |  | 9 |  |  | 33.5 |  |  |  |  | 3.99 |  | 15.6 | 5.26 |
| *Plebeia droryana* | 3 | 30.9 |  |  |  | 9.61 |  |  | 31.4 |  |  |  |  | 5.19 |  | 16.3 | 6.59 |
| *Plebeia droryana* | 4 | 35.5 |  |  |  | 9.14 |  |  | 34.3 |  |  |  |  | 3.06 |  | 14.5 | 3.57 |
| *Plebeia droryana* | 5 | 29.5 |  |  |  | 11.6 |  |  | 27 |  |  |  |  | 7.93 |  | 17.3 | 6.66 |
| *Plebeia droryana* | 6 | 39.6 |  |  |  | 7.28 |  |  | 25.9 |  |  |  |  | 0 |  | 24.3 | 3.04 |
| *Plebeia droryana* | 7 | 41 |  |  |  | 5.88 |  |  | 23.5 |  |  |  |  | 0.28 |  | 25.6 | 3.71 |
| *Pseudaugochlora graminea* | 1 | 0.08 | 9.21 |  | 4.8 |  |  |  |  |  | 46.7 |  | 9.56 |  |  | 1.66 | 28 |
| *Scaptotrigona postica* | 1 | 16.2 | 0.22 |  |  |  | 30.6 |  |  | 9.95 |  |  |  |  | 11.6 | 24.5 | 7.01 |
| *Scaptotrigona postica* | 2 | 16.8 | 0 |  |  |  | 34.63 |  |  | 8.37 |  |  |  |  | 12.3 | 20.7 | 7.21 |
| *Scaptotrigona postica* | 3 | 16.4 | 0.18 |  |  |  | 31.34 |  |  | 9.81 |  |  |  |  | 11.3 | 23.9 | 7 |
| *Scaptotrigona postica* | 4 | 16.1 | 0.03 |  |  |  | 35.29 |  |  | 8.73 |  |  |  |  | 11.1 | 21.8 | 6.95 |
| *Scaptotrigona postica* | 5 | 16.1 | 0.1 |  |  |  | 32.25 |  |  | 9.61 |  |  |  |  | 11 | 24 | 6.93 |
| *Scaptotrigona postica* | 6 | 16.1 | 0.1 |  |  |  | 34.01 |  |  | 8.73 |  |  |  |  | 11.3 | 23 | 6.74 |
| *Scaptotrigona postica* | 7 | 16.5 | 0.04 |  |  |  | 29.64 |  |  | 10.4 |  |  |  |  | 11.8 | 24.8 | 6.85 |
| *Schwarziana quadripunctata* | 1 | 17.6 | 8.62 |  |  | 0 | 23.89 | 1.88 | 38.7 | 0 |  |  |  | 0.12 |  | 9.22 |  |
| *Schwarziana quadripunctata* | 2 | 17.9 | 8.6 |  |  | 0 | 23.75 | 1.93 | 38.6 | 0 |  |  |  | 0.52 |  | 8.67 |  |
| *Schwarziana quadripunctata* | 3 | 18 | 8.58 |  |  | 0 | 23.75 | 1.92 | 38.5 | 0 |  |  |  | 0.58 |  | 8.73 |  |
| *Schwarziana quadripunctata* | 4 | 18 | 8.57 |  |  | 0 | 23.73 | 1.9 | 38.4 | 0.01 |  |  |  | 0.64 |  | 8.8 |  |
| *Schwarziana quadripunctata* | 5 | 18 | 8.57 |  |  | 0 | 23.68 | 0.88 | 39 | 0.04 |  |  |  | 0.58 |  | 9.31 |  |
| *Schwarziana quadripunctata* | 6 | 18 | 8.61 |  |  | 0.1 | 23.7 | 1.46 | 38 | 0.09 |  |  |  | 0.67 |  | 9.36 |  |
| *Schwarziana quadripunctata* | 7 | 18 | 8.63 |  |  | 0.13 | 23.66 | 1.43 | 37.9 | 0.16 |  |  |  | 0.77 |  | 9.4 |  |
| *Tetragonisca angustula* | 1 | 21.2 | 15.7 |  | 21.2 |  |  |  |  |  | 9.72 |  | 15 |  |  | 14.8 | 2.33 |
| *Tetragonisca angustula* | 2 | 21.5 | 16.4 |  | 22.1 |  |  |  |  |  | 9.26 |  | 14.9 |  |  | 14 | 1.92 |
| *Tetragonisca angustula* | 3 | 21.9 | 17 |  | 22 |  |  |  |  |  | 9.12 |  | 14.9 |  |  | 13.5 | 1.56 |
| *Tetragonisca angustula* | 4 | 25.5 | 18 |  | 24 |  |  |  |  |  | 9.38 |  | 12.3 |  |  | 9.87 | 1 |
| *Tetragonisca angustula* | 5 | 19.5 | 16.1 |  | 23 |  |  |  |  |  | 11.3 |  | 11.1 |  |  | 18.1 | 0.92 |
| *Tetragonisca angustula* | 6 | 22.8 | 18.1 |  | 23.9 |  |  |  |  |  | 8.86 |  | 14.3 |  |  | 11.1 | 0.87 |
| *Tetragonisca angustula* | 7 | 16.6 | 16.9 |  | 23.7 |  |  |  |  |  | 12.5 |  | 9.94 |  |  | 19.2 | 1.18 |
| *Thygater analis* | 1 | 10.3 | 59.7 |  | 15.1 |  |  |  |  |  | 5.63 |  | 0 |  |  | 7.89 | 1.39 |
| *Thygater analis* | 2 | 10.4 | 58.9 |  | 15.1 |  |  |  |  |  | 5.93 |  | 0 |  |  | 8.16 | 1.57 |
| *Thygater analis* | 3 | 6.39 | 55.7 |  | 9.66 |  |  |  |  |  | 6.92 |  | 0 |  |  | 20.9 | 0.4 |
| *Trigona branneri* | 1 | 1.13 | 9.33 |  | 0.06 |  |  |  |  |  | 32.8 |  | 21.9 |  |  | 19.1 | 15.7 |
| *Trigona fuscipennis* | 1 | 5.35 | 20.6 |  | 0.38 |  |  |  |  |  | 62.7 |  | 0.32 |  |  | 0.37 | 10.3 |
| *Trigona hyalinata* | 1 | 18.2 |  |  |  |  | 43.26 |  |  | 2.34 |  |  |  |  | 5.98 | 14.4 | 15.8 |
| *Trigona hyalinata* | 2 | 17.7 |  |  |  |  | 42.15 |  |  | 4.27 |  |  |  |  | 5.85 | 14.1 | 15.9 |
| *Trigona hyalinata* | 3 | 18.5 |  |  |  |  | 43.56 |  |  | 0.96 |  |  |  |  | 6.11 | 14.9 | 16 |
| *Trigona hyalinata* | 4 | 18.4 |  |  |  |  | 44.06 |  |  | 0.66 |  |  |  |  | 5.96 | 14.7 | 16.2 |
| *Trigona hyalinata* | 5 | 18.3 |  |  |  |  | 44.51 |  |  | 0.34 |  |  |  |  | 5.84 | 14.8 | 16.2 |
| *Trigona hyalinata* | 6 | 18.1 |  |  |  |  | 44.92 |  |  | 0.28 |  |  |  |  | 5.73 | 14.8 | 16.2 |
| *Trigona hyalinata* | 7 | 29.5 |  |  |  |  | 35.14 |  |  | 1.13 |  |  |  |  | 4.03 | 17.6 | 12.6 |
| *Trigona spinipes* | 1 | 27.1 | 30.3 |  | 33.1 |  |  |  |  |  | 0 |  | 4.65 |  |  | 2.15 | 2.84 |
| *Trigona spinipes* | 2 | 26.9 | 30.1 |  | 33.2 |  |  |  |  |  | 0 |  | 4.9 |  |  | 1.98 | 2.97 |
| *Trigona spinipes* | 3 | 26.9 | 30 |  | 32.9 |  |  |  |  |  | 0 |  | 5.06 |  |  | 2.11 | 3.07 |
| *Trigona spinipes* | 4 | 27 | 29.6 |  | 32.7 |  |  |  |  |  | 0 |  | 5.19 |  |  | 2.26 | 3.17 |
| *Trigona spinipes* | 5 | 27.2 | 29.4 |  | 32.5 |  |  |  |  |  | 0 |  | 5.28 |  |  | 2.4 | 3.24 |
| *Trigona spinipes* | 6 | 28 | 28.7 |  | 31.3 |  |  |  |  |  | 0 |  | 5.56 |  |  | 2.54 | 3.89 |
| *Trigona spinipes* | 7 | 28 | 28.5 |  | 31.1 |  |  |  |  |  | 0 |  | 5.75 |  |  | 2.65 | 4.02 |
| *Xylocopa muscaria* | 1 | 6.42 | 1.95 |  | 3.47 |  |  |  |  |  | 33.3 |  | 43.2 |  |  | 7.07 | 4.65 |
